# Supplementary material for: Research and Development of Human and Primate Antibodies for Immunotherapy of Viral Hemorrhagic Fever Infections
Source: Springer Nature journal article supplement (doi:10.1038/s41467-022-34133-8), 1989-06-01
Supplement: MOESM1 [file 41467_2022_34133_MOESM1_ESM.pdf]

a

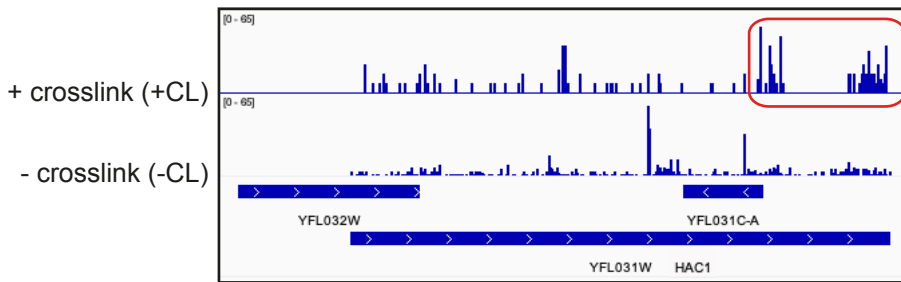

b

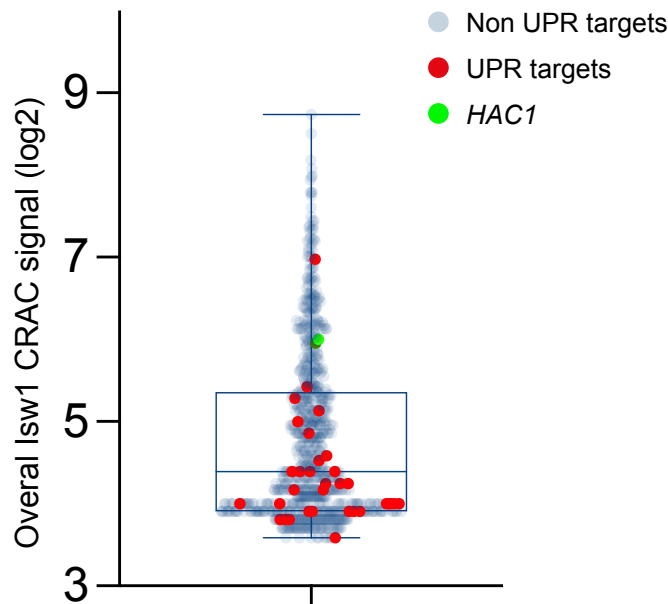

### Supplementary Figure 1

**a** Snapshot showing the distribution of the sites of crosslink of lsw1 to the *HAC1* mRNA. These are inferred from the occurrence of one or two nucleotides deletions that are generated when the reverse transcriptase transcribes through the nucleotides covalently bound to the short peptide remaining after proteolytic digestion of the complex<sup>25,57</sup>. The region containing major lsw1 binding sites is boxed in red.

**b** Whisker plots showing the overall CRAC signal (log2) contained in the specific peaks of lsw1 binding to its RNA targets. Peaks of lsw1 binding were identified using extractPeaks<sup>64</sup> and only the peaks specifically present in the crosslinked sample were considered for higher specificity. Boxes extend from the 25th to 75th percentiles. The line in the middle of the box is plotted at the median. Whiskers are plotted down to the minimum and up to the maximum value, and each individual value is plotted as a point superimposed on the graph, corresponding to a transcript. All yeast genes have been included in the analysis. UPR targets and *HAC1* are shown in red and green respectively. Two independent experiments have been performed.

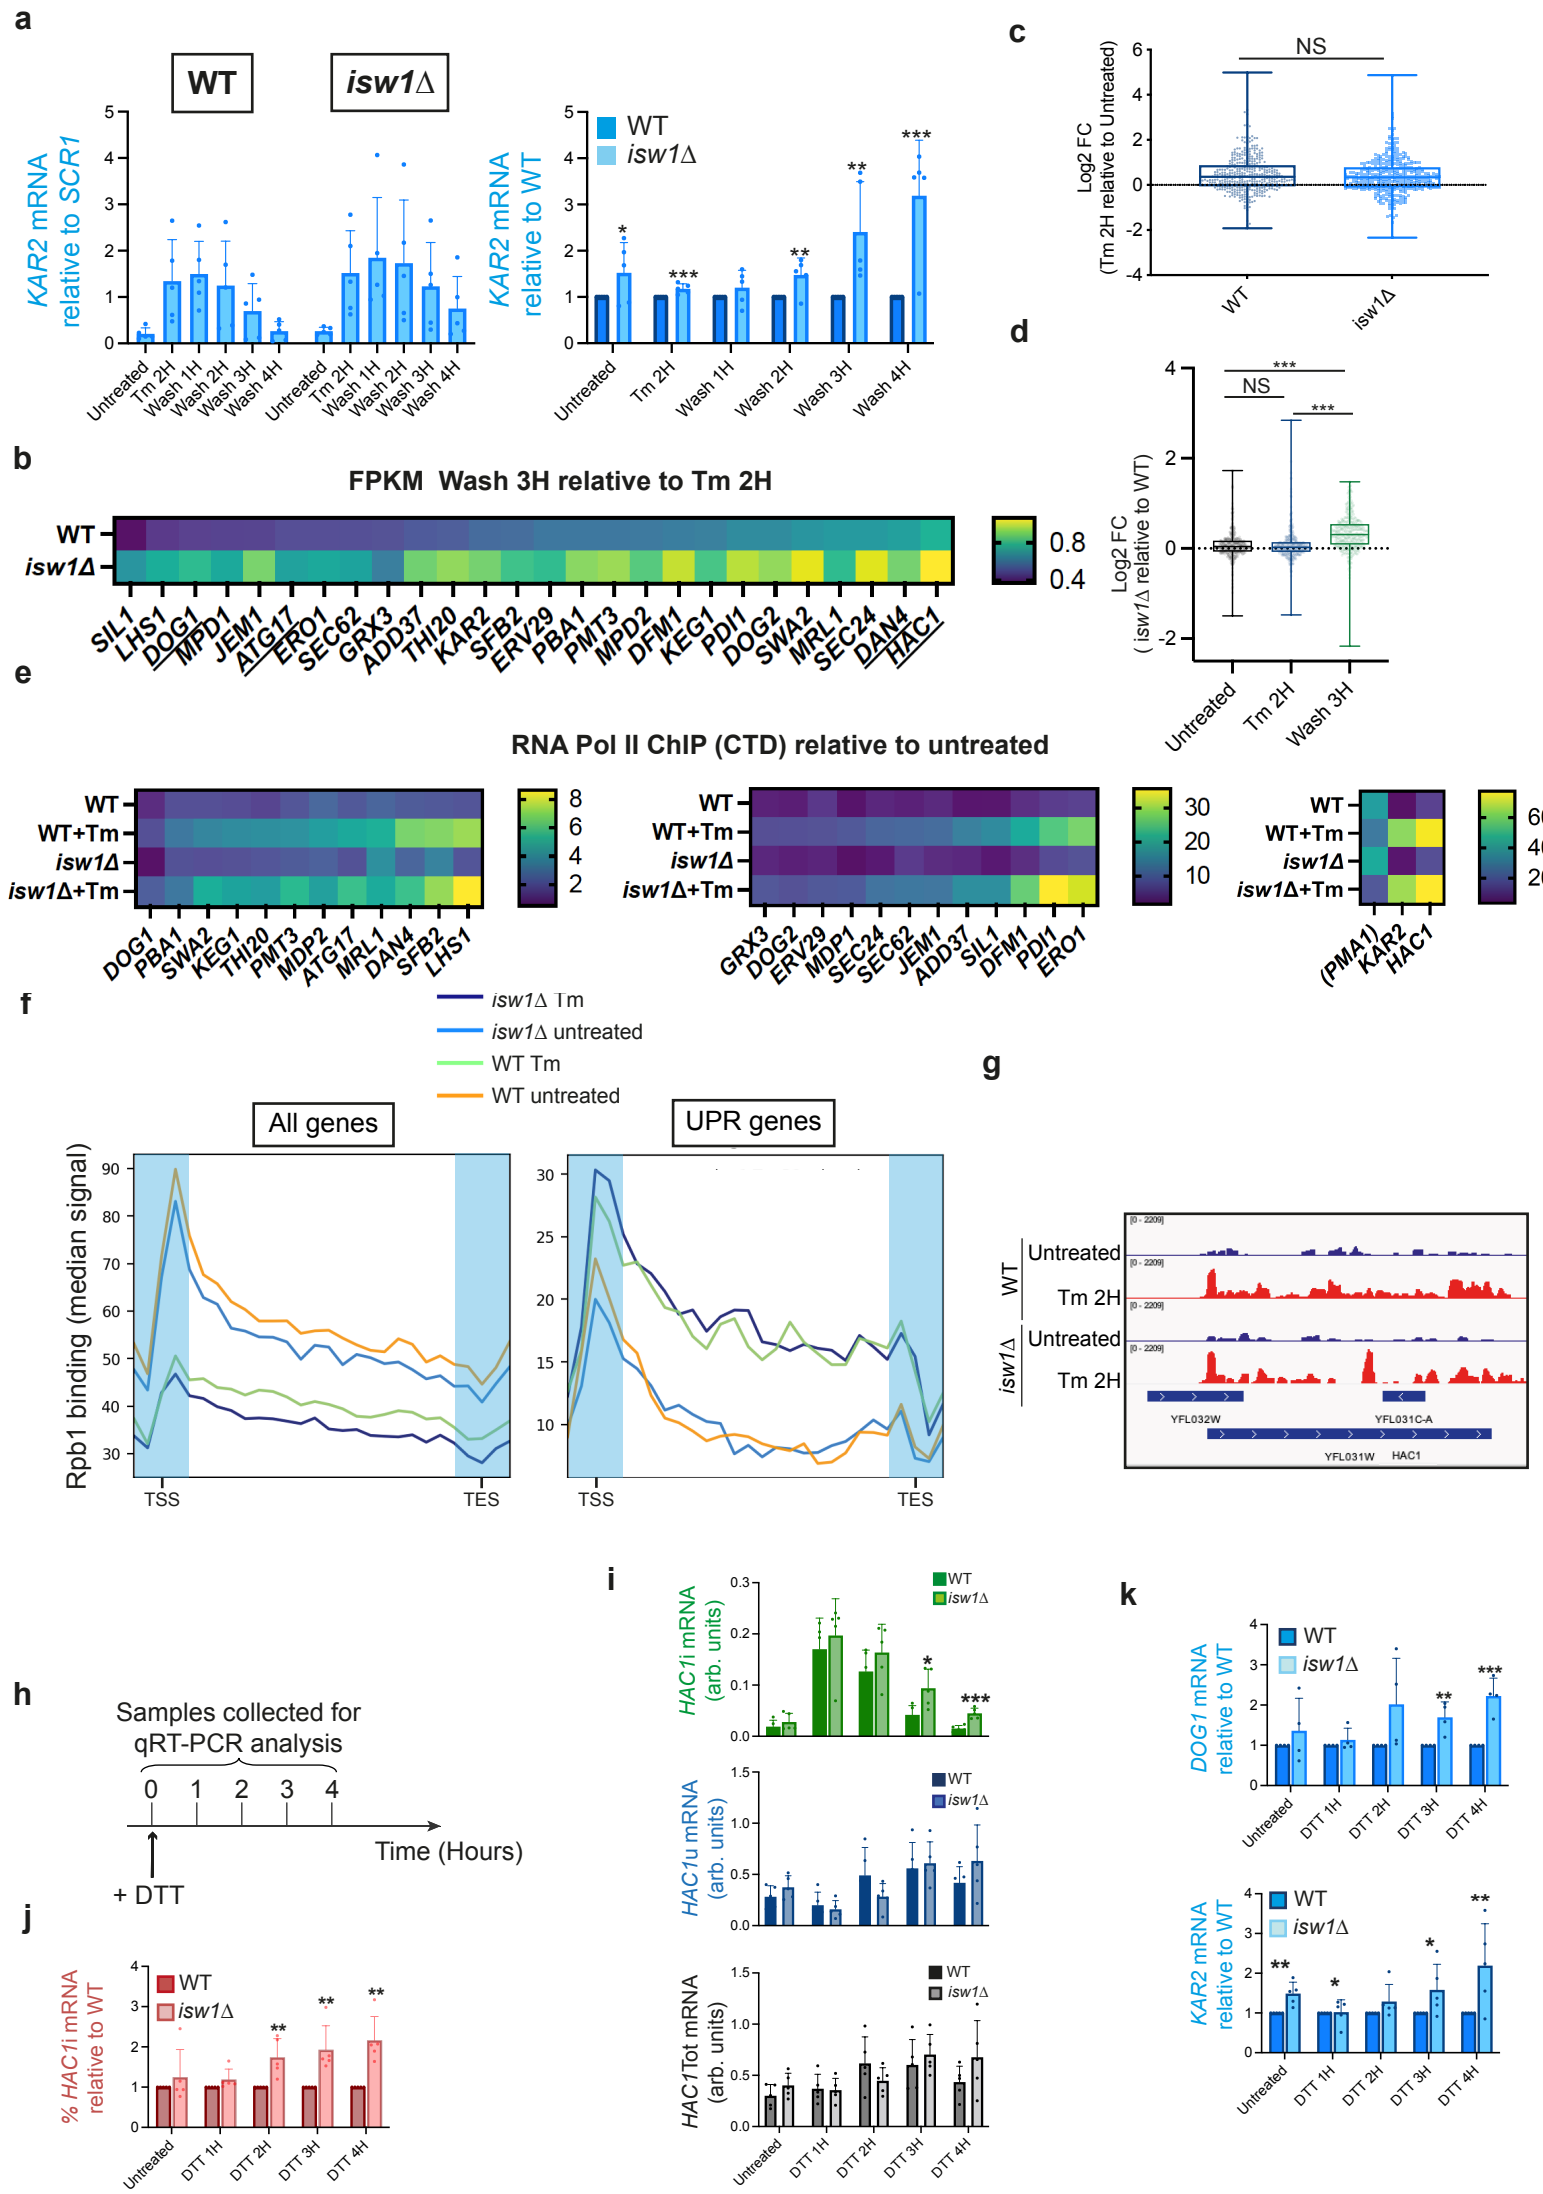

## Supplementary Figure 2

- a** The mRNA expression level of Hac1 targets is prolonged in *isw1Δ* cells compared to WT during Tm UPR time course. qRT-PCR analysis of *KAR2* expression level in *isw1Δ* cells relative to WT during Tm UPR time course. n = 5 independent experiments, mean ± sd. Unpaired one-tailed t-tests (p values relative to WT: 5,48E-03, 7,09E-03, 2,94E-02, 2,67E-03, 2,41E-02 and 2,05E-03 for Untreated, Tm 2H, Wash 1H, Wash 2H, Wash 3H and Wash 4H respectively).
- b** Heat maps comparing the expression fold change of 25 of the most robustly induced UPR targets 3h after drug removal relative to 2 H Tm treatment in WT and *isw1Δ* cells. For each cell type, the ratio between average normalized FPKM of three biological replicates at Tm 2 H and Wash 3 H is plotted. All genes were differentially expressed at Tm 2 H. Bold and underline indicate genes that were still differentially expressed upon Tm wash in *isw1Δ* and WT cells respectively.
- c** Whisker plots comparing the expression fold change of all UPR targets (defined in 11) after 2 H Tm treatment relative to untreated conditions in WT and *isw1Δ* cells. Boxes extend from the 25th to 75th percentiles. The line in the middle of the box is plotted at the median. Whiskers are plotted down to the minimum and up to the maximum value, and each individual value is plotted as a point superimposed on the graph. n= 3 independent biological replicates. Unpaired two-tailed t-test (p value *isw1Δ* relative to WT: 0,2700).
- d** Whisker plots comparing the expression fold change of all UPR targets between WT and *isw1Δ* cells in untreated, Tm 2 H and Wash 3 H conditions. Boxes extend from the 25th to 75th percentiles. The line in the middle of the box is plotted at the median. Whiskers are plotted down to the minimum and up to the maximum value, and each individual value is plotted as a point superimposed on the graph. n= 3 independent biological replicates. Unpaired two-tailed t-tests (p values relative to Untreated: 0,9806 and < 0,0001 for Tm 2H and Wash 3H respectively. (p value Wash 3H relative to Tm 2H : <0,0001).
- e** Heat maps showing RNA Polymerase II occupancy as determined by ChIP on the 25 most robustly induced UPR target genes depicted in Fig S2b and *PMA1*, in WT and *isw1Δ* cells. Values (mean, n=3 independent experiments), expressed as a percentage of IP and normalized to an intergenic region (HO). Three heat maps, separated according to the Pol II recruitment values upon Tm (1 μg/mL, 2 hours), are shown to facilitate reading. *PMA1* is a non UPR target. All values are available in the source data file.
- f** Metagene analysis of median RNAPII CRAC signal to all yeast genes or to UPR genes in WT and *isw1Δ* cells in the absence of stress or in the presence of a 2 hours Tm treatment. Features were scaled with the exception of 200 nucleotides regions centered around the transcription start site (TSS) and the transcription end site (TES) (blue-shaded areas).
- g** Read coverage (total hit densities per million mapped reads) determined by CRAC, illustrating the distribution of RNAPII on the *HAC1* locus in WT and *isw1Δ* cells grown under normal conditions (blue) or after a two-hours Tm treatment (red).
- h** DTT time course experimental setting: WT and *isw1Δ* exponentially growing cells were treated with 2 mM DTT and samples were collected for analysis at t = 0 (Untreated), 1 H, 2 H, 3 H and 4 H.
- i** qRT-PCR analysis of the expression levels of *HAC1i*, *HAC1u* and *HAC1Tot* in WT and *isw1Δ* cells during the DTT UPR time course depicted in d. n = 4 independent experiments, mean ± sd. Unpaired one-tailed t-tests (p values relative to WT: 1,81E-01, 2,71E-01, 1,32E-01, 1,14E-02, 2,37E-04 for *HAC1i*, 1,11E-01, 2,89E-01, 8,13E-02, 3,71E-01, 1,24E-01 for *HAC1u* and 9,81E-02, 4,38E-01, 1,12E-01, 2,46E-01, 1,00E-01 for *HAC1Tot*).
- j** *HAC1* splicing is sustained in *isw1Δ* compared to WT cells during DTT UPR time course. The percentage of spliced *HAC1* (*HAC1i* / *HAC1Tot* x100) was calculated from the values obtained in i. n=4 independent experiments, mean ± sd. Unpaired one-tailed t-tests (p values relative to WT: 2,19E-01, 6,74E-02, 3,71E-03, 4,03E-03 and 11E-03 for Untreated, DTT 1H, DTT 2H, DTT 3H, DTT 4H respectively).
- k** The mRNA expression level of Hac1 transcriptional targets is prolonged in *isw1Δ* cells compared to WT during DTT UPR time course. qRT-PCR analysis of *DOG1* and *KAR2* expression level in *isw1Δ* cells relative to WT during DTT UPR time course. n=4, mean ± sd. Unpaired one-tailed t-tests (p values relative to WT for *DOG1*: 2,02E-01, 1,95E-01, 6,25E-02, 5,51E-03 and 7,33E-04 for Untreated, DTT 1H, DTT 2H, DTT 3H, DTT 4H respectively. p values relative to WT for *KAR2*: 2,75E-03, 4,41E-01, 8,52E-02, 3,89E-02 and 1,76E-02 for Untreated, DTT 1H, DTT 2H, DTT 3H, DTT 4H respectively).

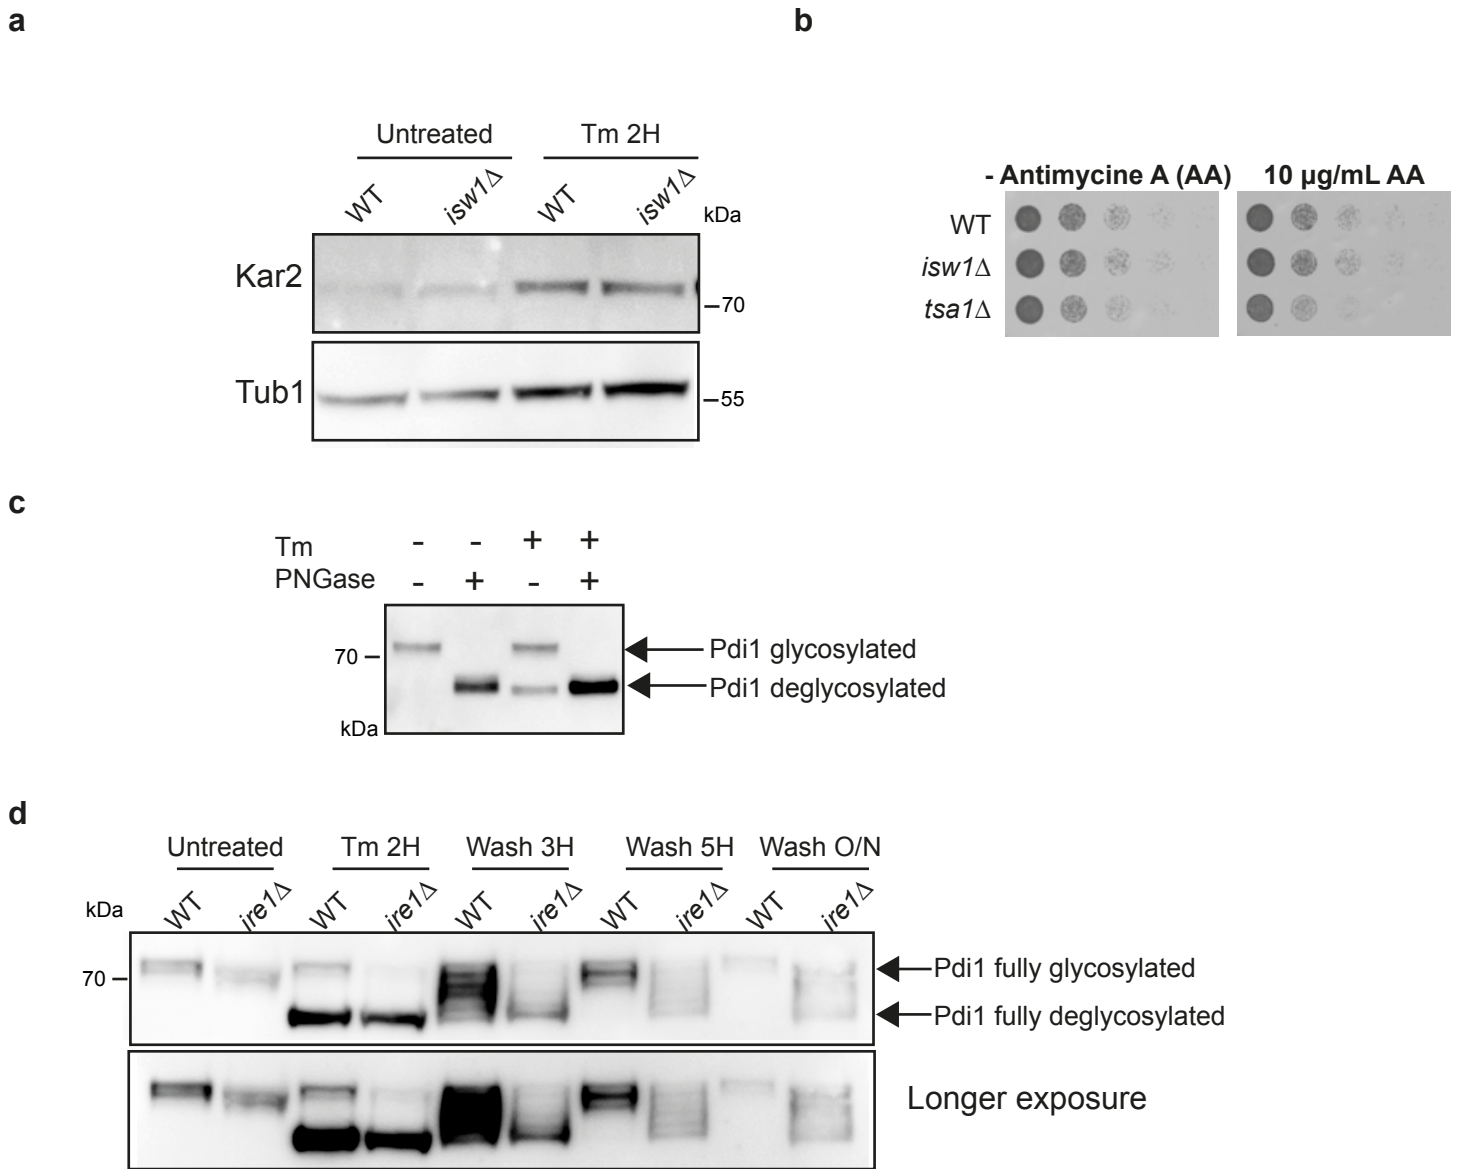

### Supplementary Figure 3

**a** Kar2 is similarly induced by Tm in WT and *isw1Δ* cells. Total protein extracts from WT and *isw1Δ* cells treated or not with 1  $\mu$ g/mL Tm for 2 H were analyzed by western blot with anti-Kar2 and Tub1 (loading) antibodies. Representative of three independent experiments.

**b** Fivefold serial dilutions of the indicated strains grown for 2 days at 30°C with or without 10  $\mu$ g/mL of the inhibitor of oxidative phosphorylation AntimycineA (AA). *tsa1Δ* mutant serves as positive controls for the effect of the drug. Three independent experiments were performed with similar results.

**c** Pdi1 is a glycosylated protein. Total protein extracts from wild-type cells treated (+) or not (-) with 1  $\mu$ g/mL Tm for 1 H were resolved by reducing SDS PAGE prior to (+) or not (-) deglycosylation with PNGase and immunoblotted against Pdi1. The blot is representative of three independent experiments.

**d** Pdi1 re-glycosylation is a proxy for ER homeostasis reestablishment. Total protein extracts from WT and *ire1Δ* cells were analyzed by western blot for Pdi1 glycosylation during Tm UPR time course. Three independent experiments were performed with similar results.

**a**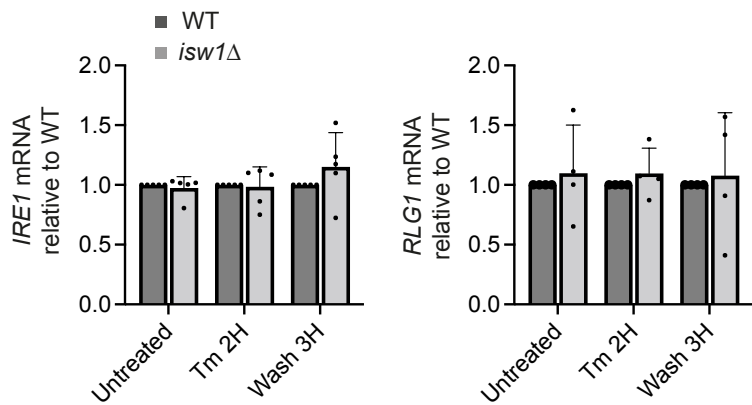**b**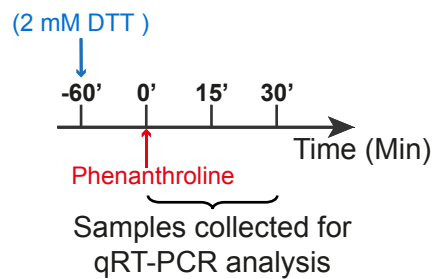**c**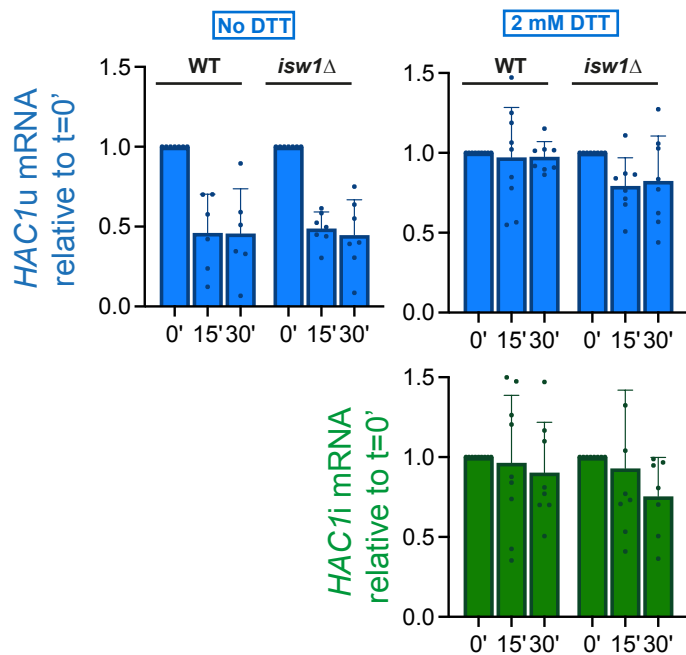**e**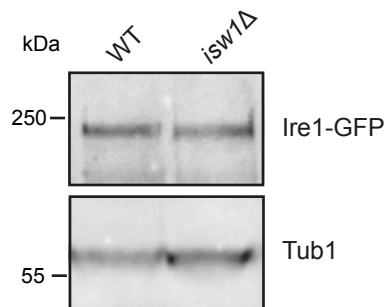**d**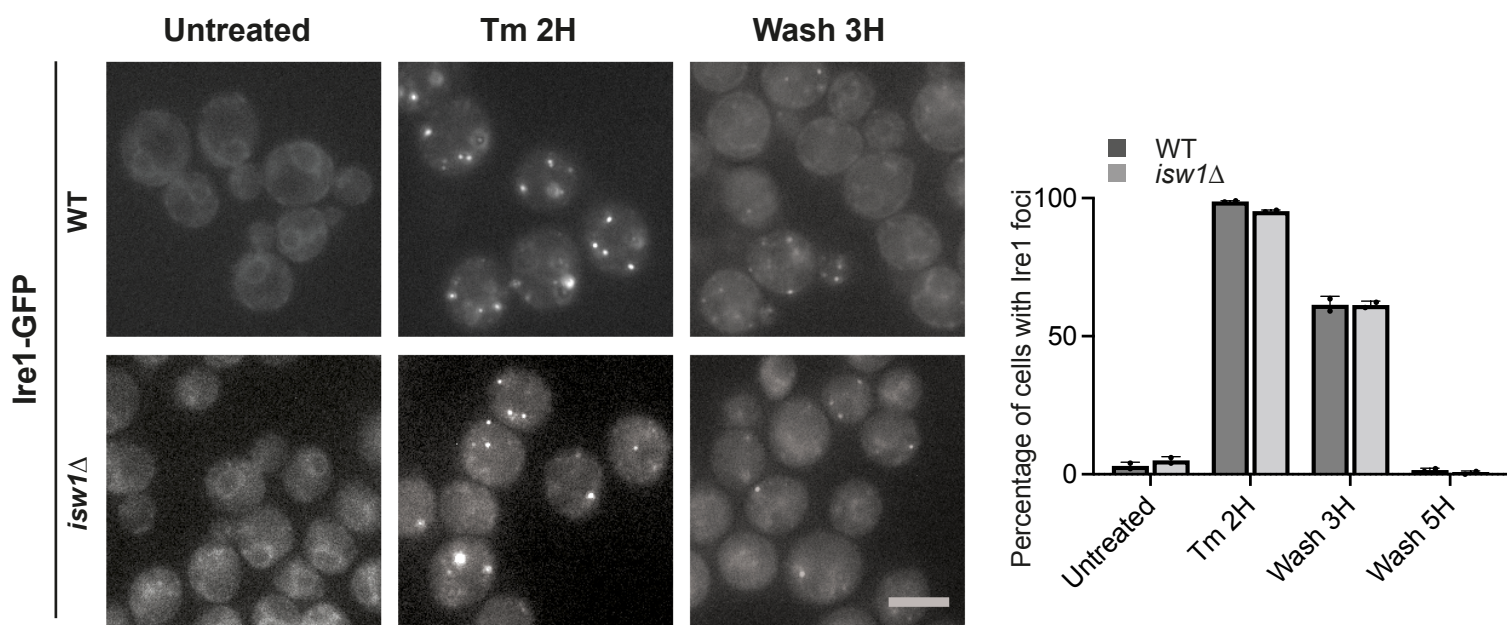

## Supplementary Figure 4 Expression of *HAC1* splicing machinery, stability of *HAC1* mRNA and kinetics of Ire1 cluster assembly and disassembly are unaffected by *ISW1* inactivation

**a** Inactivation of *ISW1* does not affect the steady-state level of *IRE1* and *RLG1* transcripts. The expression level of *IRE1* and *RLG1* during Tm UPR TC was measured by qRT-PCR in the indicated strains. n = 4 independent experiments, mean  $\pm$  sd. Unpaired one-tailed t-test (*p* values relative to WT: 2,85E-01, 4,18E-01, 1,37E-01 for *IRE1* and 3,22E-01, 2,02E-01, 3,89E-01 for *RLG1* in Untreated, Tm 2H and Wash 3H conditions.

**b** Analysis of transcripts stability. *isw1* $\Delta$  and WT cells were treated or not with DTT for 1 H and transcription was inhibited by addition of 0,2 mg/mL phenanthroline (t=0). Samples were collected for analysis at t = 0', 15' and 30'.

**c** Inactivation of *ISW1* does not affect the stability of the *HAC1* transcript in the presence or absence of DTT. WT and *isw1* $\Delta$  cells show similar *HAC1u* and *HAC1i* mRNA levels normalized to *SCR1* as analyzed by qRT-PCR. n=6 independent experiments, mean  $\pm$  sd. Unpaired one-tailed t-test (*p* values relative to WT: 3,95E-01, 4,72E-01 at 15' and 30' for *HAC1u* No DTT, 8,87E-02, 7,96E-02 for *HAC1u* +DTT and 4,38E-01, 4,17E-01 for *HAC1i* +DTT.

**d** The kinetics of Ire1 clusterization/ declusterization is not affected by *ISW1* inactivation. Ire1-GFP localization was monitored during a Tm UPR time course and the percentage of cells with Ire1 foci was quantified in at least 400 cells per experiment. n = 2 independent experiments with similar results, mean. Scale bar, 5  $\mu$ m.

**e** Similar expression of Ire1 in WT and *isw1* $\Delta$  cells. Total protein extracts from WT and *isw1* $\Delta$  cells expressing pRS315 IRE1-GFP were analyzed by western blot with anti-GFP or anti-tubulin (loading) antibodies. Three independent experiments were performed with similar results.

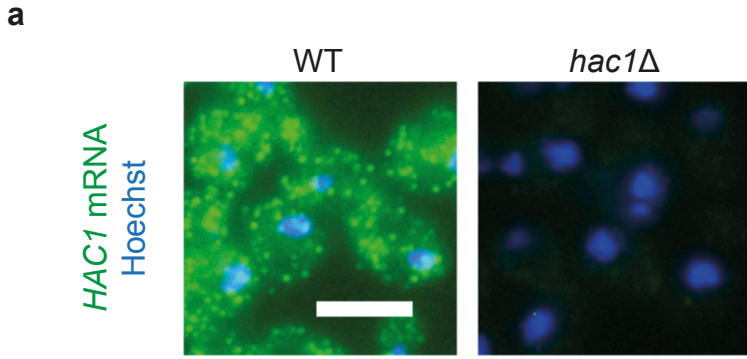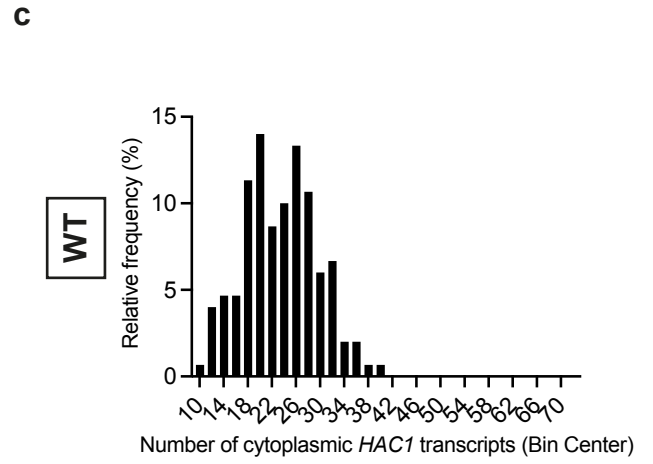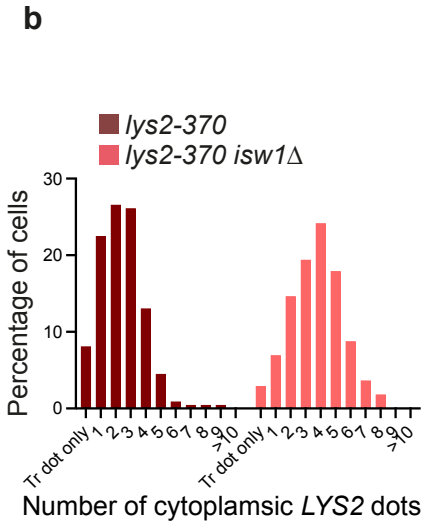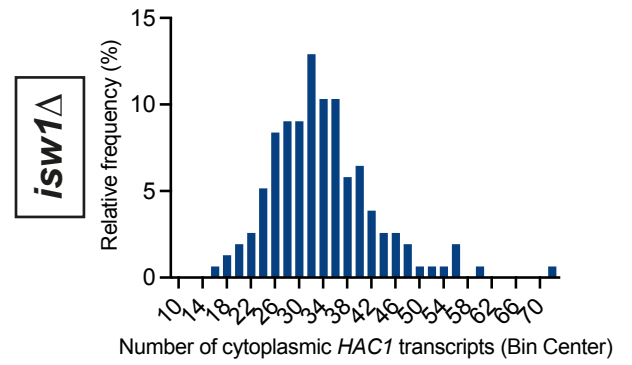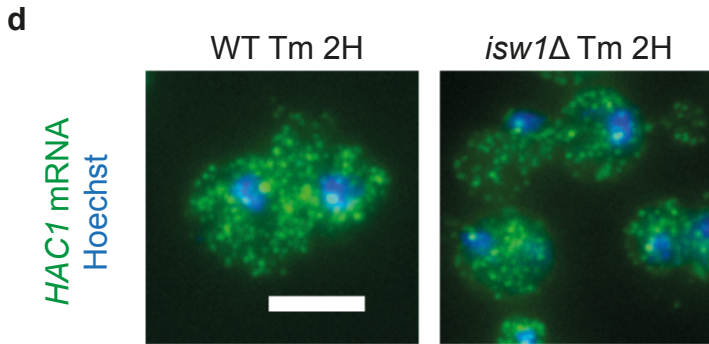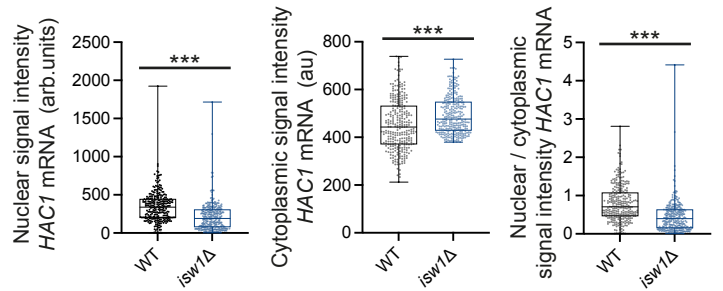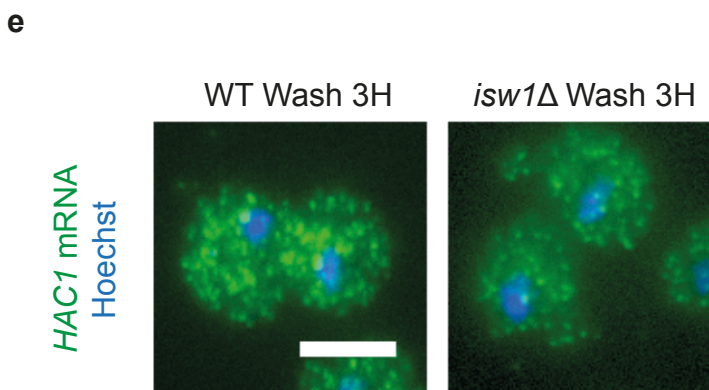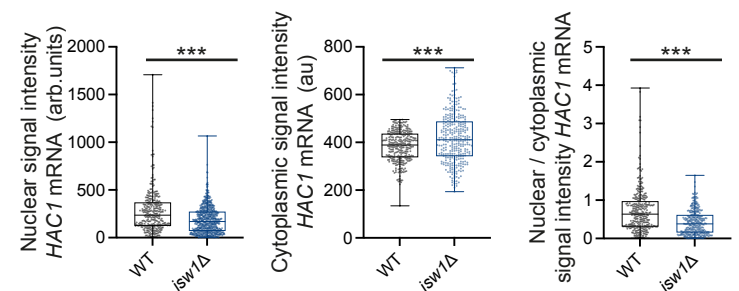

## Supplementary Figure 5

**a** Quasar®670-*HAC1* probes specificity. *HAC1* mRNA subcellular localization was analyzed by FISH in WT and *hac1Δ* cells. Scale bar, 5 μm. Two independent experiments were performed with similar results.

**b** Validation of the *HAC1* mRNA FISH quantification approach. The abundance of the *HAC1* mRNA (ranked among the top 100 most expressed mRNA) prevented the accurate identification of individual transcript and prompted us to quantify the intensities of the *HAC1* mRNA nuclear and cytoplasmic signals, as a proxy for absolute nuclear and cytoplasmic *HAC1* mRNA quantification. This approach was applied to a previously published<sup>26</sup> and manually counted data set, in which the number of cytoplasmic *LYS2* transcripts, a weakly expressed *Isw1* target, was evaluated in a mutant defective for *LYS2* mRNA nuclear export (*lys2-370*) inactivated (*lys2-370 isw1Δ*) or not for *ISW1*. The decrease in the percentage of cells with only nuclear localized *LYS2* at the expense of an increase in the percentage of cells with 3 or more cytoplasmic dots observed upon *ISW1* inactivation is mirrored by a significant decrease in the nuclear to cytoplasmic *LYS2* mRNA signal ratio. 300 independent cells were evaluated. Unpaired two-tailed t-test ( $p$  value < 0,0001). Nuclear to cytoplasmic signal intensities were plotted into whisker plots. Boxes extend from the 25th to 75th percentiles. The line in the middle of the box is plotted at the median. Whiskers are plotted down to the minimum and up to the maximum value, and each individual value is plotted as a point superimposed on the graph. Two independent experiments were performed.

**c** The number of cytoplasmic *HAC1* transcripts was evaluated by manual counting of about 150 cells per strain. Note that all cells displayed a unique nuclear dot of variable intensity, corresponding to the transcription site, at which various amounts of nuclear-retained RNAs congregate. This method is therefore complementary to the global intensity quantification approach applied in Fig. 4c. The frequency distribution of cytoplasmic *HAC1* transcripts per bin (width 2) is represented for WT and *isw1Δ*. Two independent experiments were evaluated with similar results.

**d, e** *HAC1* mRNA subcellular localization was analyzed and quantified as in Fig. 4c in WT and *isw1Δ* cells after 2 H Tm treatment and 3 H after drug removal. Nuclear and cytoplasmic Quasar®670-*HAC1* signal intensities were measured in at least 200 independent cells. Unpaired two-tailed t-test ( $p$  value < 0,0001 for Tm 2H and Wash 3H). Signal intensities were plotted into whisker plots. Boxes extend from the 25th to 75th percentiles. The line in the middle of the box is plotted at the median. Whiskers are plotted down to the minimum and up to the maximum value, and each individual value is plotted as a point superimposed on the graph. Two independent experiments were performed. Scale bar, 5 μm.



**a**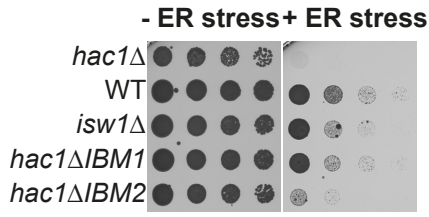**b**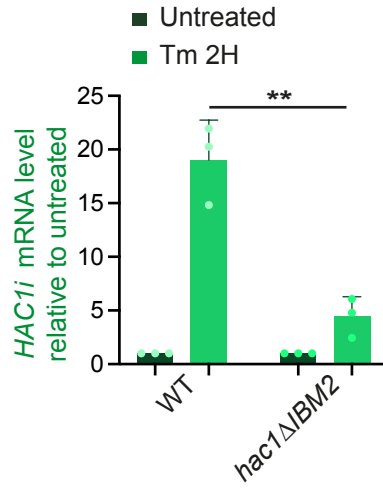**c**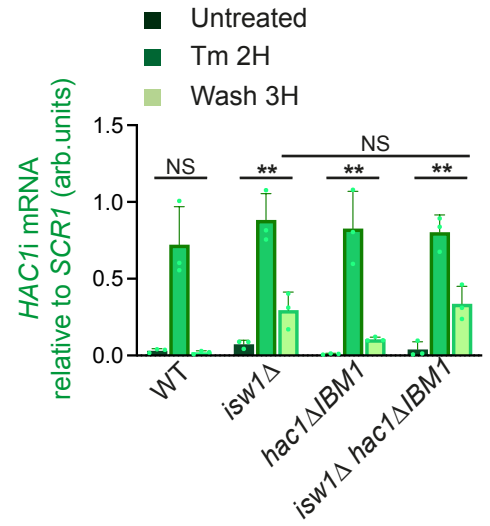**d**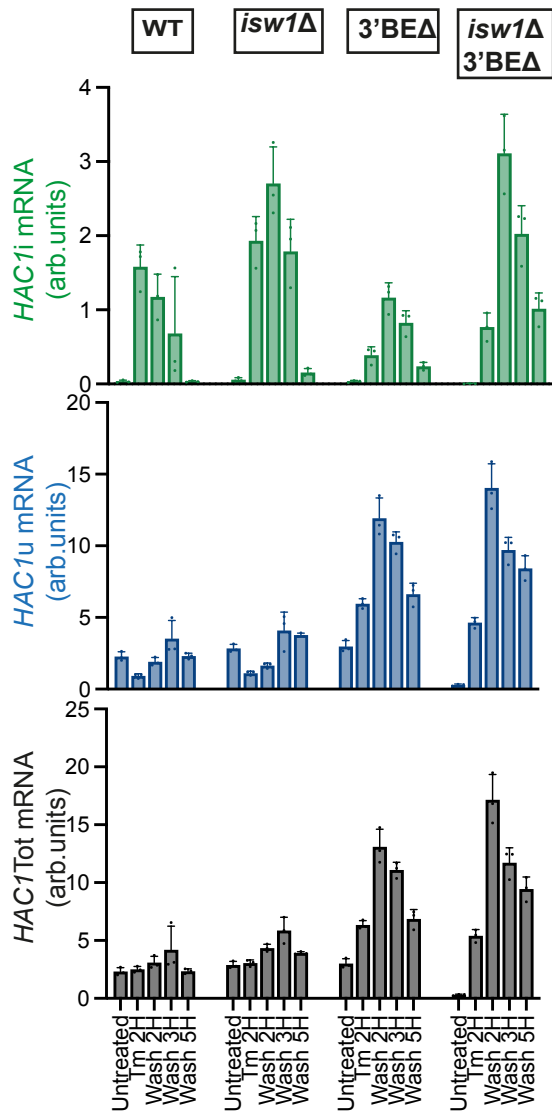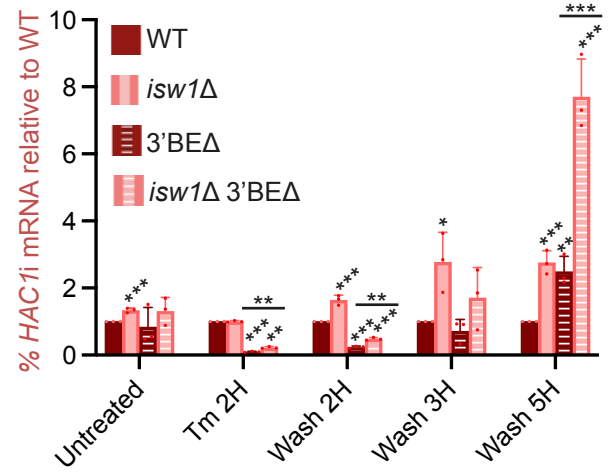**e**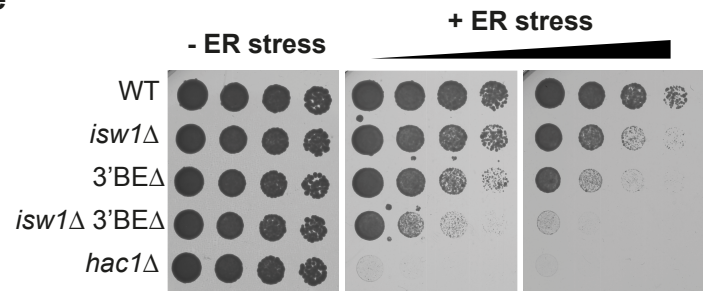**f**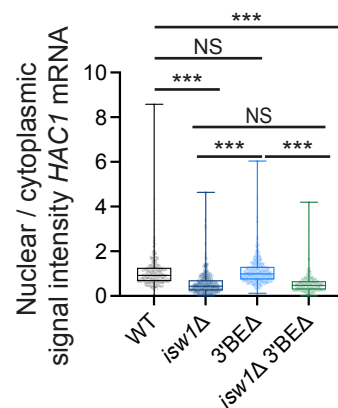

## Supplementary Fig. 6

**a** *hac1Δ* IBM2 cells are hypersensitive to Tm. Fivefold serial dilutions of the indicated strains grown for 3 days at 30°C with (+ER stress) or without (- ER stress) 0,4 µg/mL Tm.

**b** *hac1Δ* IBM2 cells are compromised for UPR induction. *HAC1i* mRNA level normalized by *SCR1* upon 2 H Tm treatment relative to untreated conditions as evaluated by qRT-PCR analysis. n = 3 independent experiments, mean ± sd. Unpaired one-tailed t-test (*p* value *hac1Δ* IBM2 relative to WT: 1,86E-03).

**c** *HAC1i* relative to *SCR1* mRNA expression during Tm UPR time courses, as evaluated by qRT-PCR in the indicated strains. n = 4 independent experiments, mean ± sd. Unpaired one-tailed t-test (*p* values relative to Untreated: 1,50E-01, 1,64E-02, 1,42E-04, 7,15E-03 for WT, *isw1Δ*, *hac1Δ* IBM1 and *isw1Δhac1Δ* IBM1 respectively. *p* value *isw1Δhac1Δ* IBM1 relative to *isw1Δ*: 3,41E-01).

**d** qRT-PCR analysis of the expression levels of *HAC1i*, *HAC1u*, and *HAC1Tot* and of the percentage of spliced *HAC1* in WT, *isw1Δ*, *hac1Δ* 3'BE and *isw1Δ*, *hac1Δ* 3'BE cells during Tm UPR time course. n = 3 independent experiments, mean ± sd. Unpaired one-tailed t-tests (*p* values relative to WT: 4,80E-04, 3,77E-01, 7,64E-04, 1,25E-02, 5,13E-04 for *isw1Δ*, 3,34E-01, 8,06E-08, 8,33E-07 1,17E-01, 2,25E-03 for *hac1Δ* 3'BE, 1,25E-01, 4,78E-07, 1,20E-05, 1,21E-01, 2,42E-04 for *isw1Δ*, *hac1Δ* 3'BE. *p* values *isw1Δ*, *hac1Δ* 3'BE relative to *hac1Δ* 3'BE: 1,57E-01, 1,37E-03, 5,53E-04, 7,50E-02, 8,51E-04 for Untreated, Tm 2H, Wash 2H, Wash 3H, Wash 5H respectively).

**e** Fivefold serial dilutions of the indicated strains grown for 3 days at 30°C in the presence (+ ER stress) or not (- ER stress) of 0,4 µg/mL or 0,6 µg/mL Tm.

**f** *HAC1* mRNA localization was analyzed by FISH using Quasar®670-*HAC1* probes in the indicated strains and quantified as in Fig. 4c. Nuclear and cytoplasmic Quasar®670-*HAC1* signal intensities were measured in at least 200 independent cells. Nuclear to cytoplasmic ratio were plotted into min to max whiskers plots. Boxes extend from the 25th to 75th percentiles. The line in the middle of the box is plotted at the median. Whiskers are plotted down to the minimum and up to the maximum value, and each individual value is plotted as a point superimposed on the graph. Two independent experiments were performed with similar results. Unpaired two-tailed t-tests (*p* values relative to WT: <0,0001, 0,1063 and <0,0001 for *isw1Δ*, *hac1Δ* 3'BE and *isw1Δ hac1Δ* 3'BE respectively. *p* value *isw1Δ hac1Δ* 3'BE relative to *isw1Δ*: 0,8035. *p* values relative to *hac1Δ* 3'BE: <0.0001 for *isw1Δ* and *isw1Δ hac1Δ* 3'BE.) Two independent experiments were performed with similar results.

**a**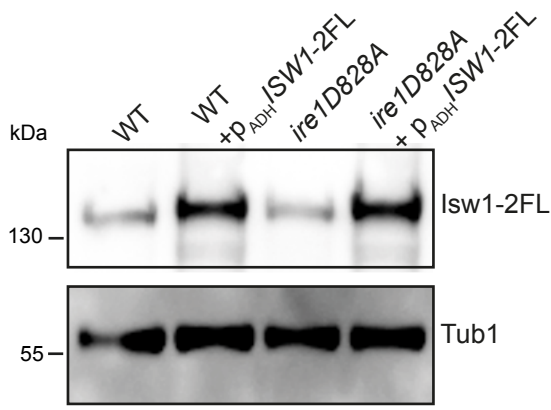**b**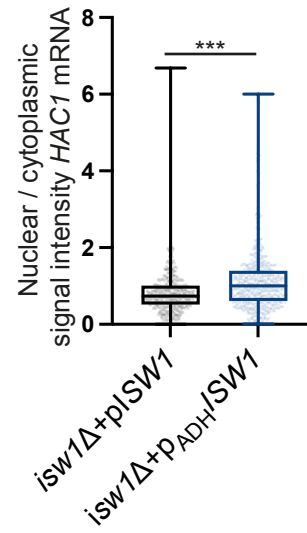**c**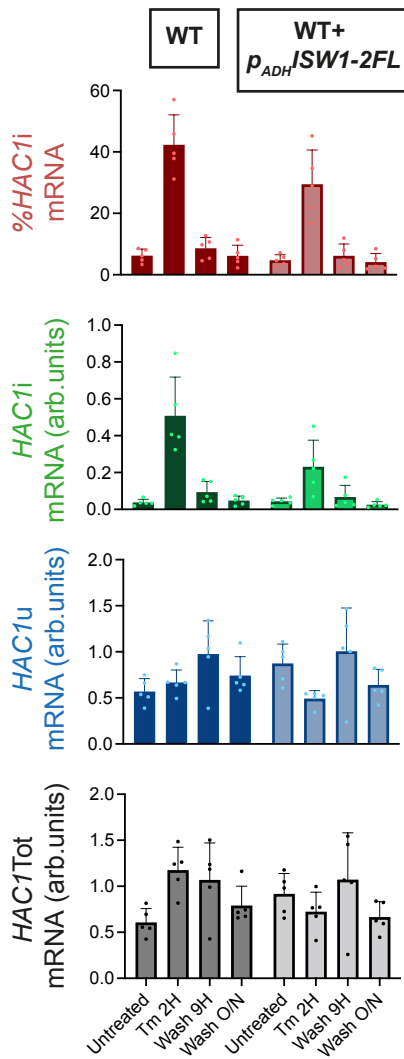**d**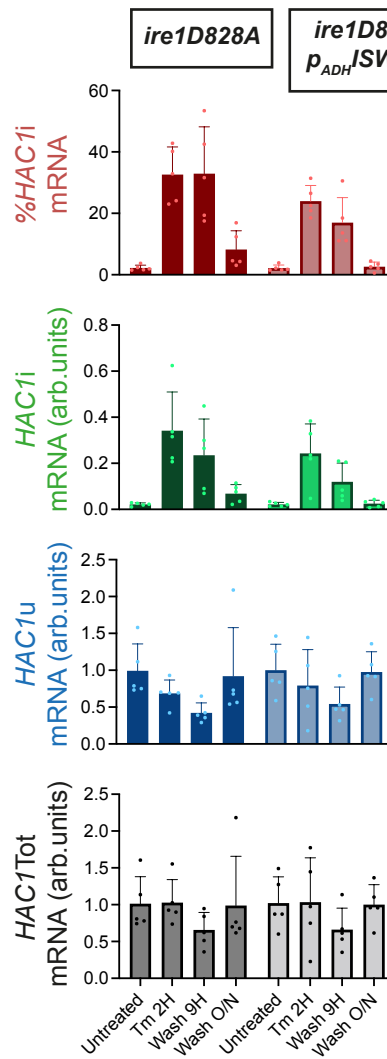**e**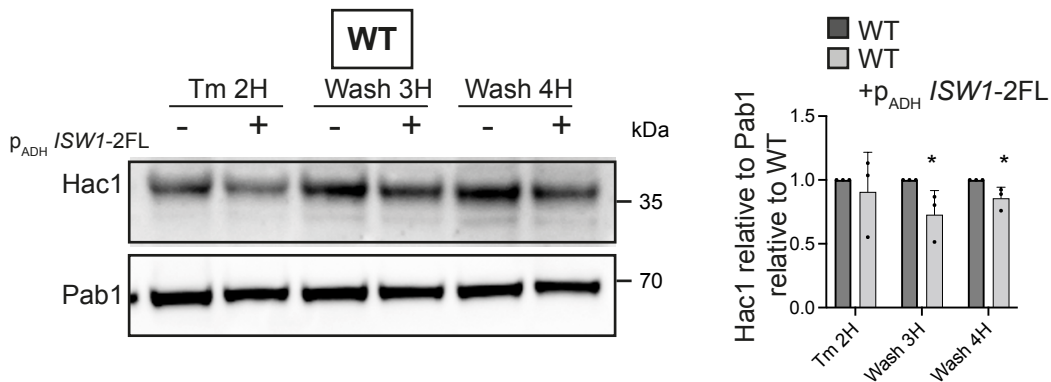

## Supplementary Figure 7

**a** *lsw1* overexpression. Total protein extracts from WT and *ire1D828A* cells overexpressing or not *lsw1-2FL* were analyzed by western blot with anti-FLAG anti-Tubulin (loading). 3 independent experiments were performed with similar results.

**b** The effect of *lsw1* overexpression on *HAC1* mRNA subcellular localization was analyzed by RNA FISH using Quasar®670-*HAC1* probes in the indicated strains and quantified as in Fig. 4c. Nuclear and cytoplasmic Quasar®670-*HAC1* signal intensities were measured in at least 200 independent cells. Unpaired two-tailed t-test ( $p$  value < 0,0001). Nuclear to cytoplasmic intensities ratio were plotted into min to max whiskers plots. Boxes extend from the 25th to 75th percentiles. The line in the middle of the box is plotted at the median. Whiskers are plotted down to the minimum and up to the maximum value, and each individual value is plotted as a point superimposed on the graph. Two independent experiments were performed.

**c, d** *lsw1* overexpression impairs *HAC1* mRNA splicing. qRT-PCR analysis of the expression levels of *HAC1i*, *HAC1u*, and *HAC1Tot* normalized to *SCR1* in WT and *ire1D828A* cells overexpressing or not *ISW1* during Tm UPR time courses.  $n = 5$  independent experiments, mean  $\pm$  sd.

**e** *ISW1* overexpression limits *Hac1* expression. Total protein extracts, prepared from WT cells, overexpressing *ISW1* (+ $p_{ADH}$ -*ISW1*) or not, during Tm time-courses were analyzed by western blot with anti-*Hac1* and *Pab1* (loading) antibodies. The level of *Hac1* and *Pab1* was quantified.  $n = 3$  independent experiments, mean  $\pm$  sd. Unpaired one-tailed t-tests ( $p$  values: 3,15E-01, 3,34E-02, 2,27E-02 for Tm 2H, Wash 2H, Wash 4H respectively)

**a**

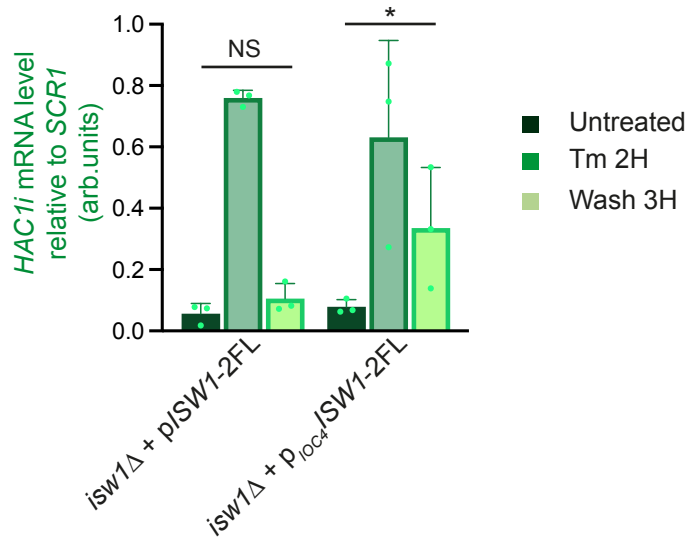

### Supplementary Fig. 8

**a** Cells expressing non-UPR-inducible *ISW1* ( $p_{IOC4}/ISW1$ ) are defective for UPR termination. *HAC1i* normalized to *SCR1* mRNA expression during Tm UPR time courses, as evaluated by qRT-PCR.  $n = 3$ , mean  $\pm$  sd. Unpaired one-tailed t-tests ( $p$  values relative to Untreated:  $1,13E-01$  and  $4,48E-02$  for *isw1Δ + pISW1-2FL* and *isw1Δ + p<sub>IOC4</sub>-2FL* respectively).

Supplementary Table 1

| <b>Name</b>             | <b>Genotype</b>                                                                               | <b>Origin</b>       |
|-------------------------|-----------------------------------------------------------------------------------------------|---------------------|
| W303                    | <i>Mat α leu2-3,112 trp1-1 can1-100 ura3-1 ade2-1 his3-11,15</i>                              | R. Haguenaue-Tsapis |
| <i>hac1Δ</i>            | <i>Mat α leu2-3,112 trp1-1 can1-100 ura3-1 ade2-1 his3-11,15, hac1::HPH</i>                   | This study          |
| <i>hac1ΔIBM1</i>        | <i>Mat α leu2-3,112 trp1-1 can1-100 ura3-1 ade2-1 his3-11,15, hac1ΔIBM1::KanMx</i>            | This study          |
| <i>hac1ΔIBM2</i>        | <i>Mat α leu2-3,112 trp1-1 can1-100 ura3-1 ade2-1 his3-11,15, hac1ΔIBM2::KanMx</i>            | This study          |
| <i>HAC1- 3'UTR ACT1</i> | <i>Mat α leu2-3,112 trp1-1 can1-100 ura3-1 ade2-1 his3-11,15, HAC1- 3'UTR ACT1-HA::KanMx</i>  | This study          |
| <i>ire1Δ</i>            | <i>Mat α leu2-3,112 trp1-1 can1-100 ura3-1 ade2-1 his3-11,15, ire1::HPH</i>                   | This study          |
| <i>isw1Δ</i>            | <i>Mat α leu2-3,112 trp1-1 can1-100 ura3-1 ade2-1 his3-11,15, isw1::KanMx</i>                 | This study          |
| <i>hac1Δisw1Δ</i>       | <i>Mat α leu2-3,112 trp1-1 can1-100 ura3-1 ade2-1 his3-11,15, hac1::HPH, isw1::KanMx</i>      | This study          |
| <i>isw1Δ hac1ΔIBM1</i>  | <i>Mat α leu2-3,112 trp1-1 can1-100 ura3-1 ade2-1 his3-11,15, isw1::HPH, hac1ΔIBM1::KanMx</i> | This study          |
| <i>ire1Δisw1Δ</i>       | <i>Mat α leu2-3,112 trp1-1 can1-100 ura3-1 ade2-1 his3-11,15, ire1::HPH, isw1::KanMx</i>      | This study          |

|                                  |                                                                                                            |            |
|----------------------------------|------------------------------------------------------------------------------------------------------------|------------|
| Cbp20-TAP                        | <i>Mat α leu2-3,112 trp1-1 can1-100 ura3-1 ade2-1 his3-11,15, Cbp20-TAP::TRP</i>                           | This study |
| Cbp20-TAP, <i>isw1Δ</i>          | <i>Mat α leu2-3,112 trp1-1 can1-100 ura3-1 ade2-1 his3-11,15, Cbp20-TAP::TRP, isw1::KanMx</i>              | This study |
| ISW1-HTP                         | <i>Mat α leu2-3,112 trp1-1 can1-100 ura3-1 ade2-1 his3-11,15, Isw1-HTP::TRP</i>                            | This study |
| ISW1-HTP, <i>HAC1-3'UTR ACT1</i> | <i>Mat α leu2-3,112 trp1-1 can1-100 ura3-1 ade2-1 his3-11,15, Isw1-HTP::TRP, HAC1-3'UTR ACT1-HA::KanMx</i> | This study |
| ISW1-HTP, <i>ΔIBM1</i>           | <i>Mat α leu2-3,112 trp1-1 can1-100 ura3-1 ade2-1 his3-11,15, Isw1-HTP::TRP, hac1ΔIBM1::KanMx</i>          | This study |
| RPB1-HTP                         | <i>Mat a leu2-3,112 trp1-1 can1-100 ura3-1 ade2-1 his3-11,15, RPB1-HTP::TRP</i>                            | D. Libri   |
| RPB1-HTP, <i>isw1Δ</i>           | <i>Mat a leu2-3,112 trp1-1 can1-100 ura3-1 ade2-1 his3-11,15, RPB1-HTP::TRP, ISW1::KanMx</i>               | This study |
| BY 4742                          | <i>MATα, his3Δ1, leu2Δ0, met15Δ0, ura3Δ0</i>                                                               | Euroscarf  |
| <i>isw1Δ</i>                     | <i>MATα, his3Δ1, leu2Δ0, met15Δ0, ura3Δ0, isw1::KanMx</i>                                                  | Euroscarf  |
| <i>sod2Δ</i>                     | <i>MATα, his3Δ1, leu2Δ0, met15Δ0, ura3Δ0, sod2::KanMx</i>                                                  | Euroscarf  |
| <i>hog1Δ</i>                     | <i>MATα, his3Δ1, leu2Δ0, met15Δ0, ura3Δ0, hog1::KanMx</i>                                                  | Euroscarf  |
| <i>get1Δ</i>                     | <i>MATα, his3Δ1, leu2Δ0, met15Δ0, ura3Δ0, get1::KanMx</i>                                                  | Euroscarf  |
| <i>tsa1Δ</i>                     | <i>MATα, his3Δ1, leu2Δ0, met15Δ0, ura3Δ0, tsa1::KanMx</i>                                                  | Euroscarf  |

Supplementary Table 2

| Plasmid name                              | Reference or origin |
|-------------------------------------------|---------------------|
| pRS416- <i>ISW1</i> -2FL                  | T. Tsukiyama        |
| pRS415 <sub>ADH</sub> - <i>ISW1</i> -2FL  | This study          |
| pRS416 <sub>IOC4</sub> - <i>ISW1</i> -2FL | This study          |
| pRS316- <i>HAC1</i>                       | M. Dey              |
| pRS314- <i>IRE1</i>                       | M. Niwa             |
| pRS314- <i>ire1D828A</i>                  | M. Niwa             |
| pRS305- <i>IRE1</i> -GFP                  | P. Walter           |



Supplementary Table 3

| Primer name | Target      | Primer sequence              |
|-------------|-------------|------------------------------|
| qAB120      | <i>DOG1</i> | F, ATAGTGAGTACAACAGTGGCCG    |
| qAB21       | <i>DOG1</i> | R, TGCACCAGGAATAAGGCTTACT    |
| qAB88       | <i>HAC1</i> | R, CATCGTAATCACGGCTGGA       |
| qAB91       | <i>HAC1</i> | F, CCTGCCGTAGACAACAACAA      |
| qAB135      | <i>HAC1</i> | R, TCAAACCTGACTGCGCTTCT      |
| qAB124      | <i>HAC1</i> | F, TACGTTACACCTTCACCTCTG     |
| qAB125      | <i>HAC1</i> | R, TCCGTCTTAAACATCTGCAGCT    |
| qAB136      | <i>IOC2</i> | F, ACCTCTTCAATAACCGCCCAT     |
| qAB137      | <i>IOC2</i> | R, TTCTATTGCCGTGCGAATTTCC    |
| qAB114      | <i>IRE1</i> | F, ATTTCCGGAGCCAGAGTGTG      |
| qAB115      | <i>IRE1</i> | R, TGAAGCGCTAGGGGAACATC      |
| qAB100      | <i>ISW1</i> | F, TCAGCAGATGTCGTTGTCTTGTA   |
| qAB101      | <i>ISW1</i> | R, GCTTCTTCTGACCAATACGATGC   |
| qAB104      | <i>KAR2</i> | F, TAGTTAGAGGTGCCGATGATGTAG  |
| qAB105      | <i>KAR2</i> | R, GTAAGATGGGGTGATTCTGTTACC  |
| qAB108      | <i>PDII</i> | F, ATTGGAAGAATACAAGCCTCTCTTT |
| qAB109      | <i>PDII</i> | R, TTCATTAGACCTCTGTTCTTTTTGG |
| qAB7        | <i>PMA1</i> | F, TCAGCTCATCAGCCAACCTCAAG   |
| qAB8        | <i>PMA1</i> | R, CGTCGACACCGTGATTAGATTG    |
| qAB88       | <i>SCRI</i> | F, GTTCTGAAGTGTCCCGGCTATAA   |
| qAB89       | <i>SCRI</i> | R, CACCAGACAGAGAGACGGATTC    |
| qAB140      | <i>RLG1</i> | F, TGGCAAAACAACAACCTCCCAG    |
| qAB141      | <i>RLG1</i> | R, CGCGGAATTGGTGATTGTTTCT    |
| qAB168      | <i>SIL1</i> | F, TCATGGCCGCTCTGTCAAAT      |
| qAB169      | <i>SIL1</i> | R, TCGTACATGTCGGCCTTCAA      |
| qAB170      | <i>LHS1</i> | F, AACTACTCAGCCCGTTACA       |
| qAB171      | <i>LHS1</i> | R, ACTTTGCCTTCTCTGCTGCT      |

|        |              |                                          |
|--------|--------------|------------------------------------------|
| qAB172 | <i>KEG1</i>  | F, CGTAAGGGCGTAAAGGAAAGA                 |
| qAB173 | <i>KEG1</i>  | R, TGCTAGTAAAACACACCTGTTG                |
| qAB174 | <i>JEM1</i>  | F, position 1546 in CAACAGCAGCAACAACACCA |
| qAB175 | <i>JEM1</i>  | R, TGTTTGTCGTTATGGTTGGCC                 |
| qAB176 | <i>GRX3</i>  | F, TAAATGGTCAATGCCGCGC                   |
| qAB177 | <i>GRX3</i>  | R, AGTTGAGGGAAAGTTGGCCA                  |
| qAB178 | <i>DFM1</i>  | F, GTGCCACAATGAAACTGCA                   |
| qAB179 | <i>DFM1</i>  | R, AGGGGCTGTTTGTTCCT                     |
| qAB180 | <i>DAN4</i>  | F, AGCAACCACTTCCGCAGAAT                  |
| qAB181 | <i>DAN4</i>  | R, ACGGCTGAAAGTAAAGTGGA                  |
| qAB182 | <i>ATG17</i> | F, AGTGCCAGTAATTGAGCGTCA                 |
| qAB183 | <i>ATG17</i> | TTCAAGGTCCGTTAGTTCCCTG                   |
| qAB184 | <i>ADD37</i> | F, AGGTGTGCTCGTAAAAGACCA                 |
| qAB185 | <i>ADD37</i> | R, ACTGTTTTGGTGTGCTCGTT                  |
| qAB186 | <i>SWA2</i>  | F, AGGCGTGCTGAGTCTTTTGA                  |
| qAB187 | <i>SWA2</i>  | R, TTTTGTTCAGGCGAGGTTG                   |
| qAB188 | <i>SFB2</i>  | F, AGCACTGGAGGCAAAGTTGA                  |
| qAB189 | <i>SFB2</i>  | R, AAAACGGCCAGGTGAGATA                   |
| qAB190 | <i>SEC24</i> | F, AACAAATGAAGAGTCCGCCGA                 |
| qAB191 | <i>SEC24</i> | R, ACCACCAACGCCACCAATTA                  |
| qAB192 | <i>PBA1</i>  | F, TCTGCCCGGTTCCAAAAGTT                  |
| qAB193 | <i>PBA1</i>  | R, TGGGGAAGACTTGACTTTTCA                 |
| qAB194 | <i>MLR1</i>  | F, ACGAAAACGGCTCTATGTGC                  |
| qAB195 | <i>MLR1</i>  | R, TTCTCCCCGCAAATTCGACT                  |
| qAB196 | <i>MPD2</i>  | F, TGAAGCTGTCACGATGGTCA                  |
| qAB197 | <i>MPD2</i>  | R, AATCCAGGCAAGTCCGTACA                  |
| qAB198 | <i>MPD1</i>  | F, ACCCAAACTTTCCGTGGTGT                  |
| qAB199 | <i>MPD1</i>  | R, TATCGCTCTGTCGCTGTTCA                  |
| qAB200 | <i>SEC62</i> | F, CGCGGCTCCTATTATGTGTCTC                |

|        |               |                              |
|--------|---------------|------------------------------|
| qAB201 | <i>SEC62</i>  | R, TACACCGCAATCTTCGAACAGG    |
| qAB202 | <i>DOG2</i>   | F, GAGCTCGTGATTTATTGCGTCA    |
| qAB203 | <i>DOG2</i>   | R, CACGGAAACCTGTGTCAAATCA    |
| qAB204 | <i>ERV29</i>  | F, GGGGCTCACTGACAATGCA       |
| qAB205 | <i>ERV29</i>  | R, CATGGAAACGGTAACAACCACTAG  |
| qAB206 | <i>PMT3</i>   | F, CTGCTTACGGAGATGTAGACTTAGG |
| qAB207 | <i>PMT3</i>   | R, CCACCAGGTTCTCTTATCCCTTTT  |
| qAB208 | <i>THI20</i>  | F, TGCATCAAACCTGGCTCGTG      |
| qAB209 | <i>THI20</i>  | TGGGATTTTGTGTCAGCAGCAC       |
| qAB210 | HO intergenic | F, GAAACCACGAAAAGTTCACCA     |
| qAB211 | HO intergenic | R, AGCTTCTGCAAACCTCATTTG     |

Supplementary Table 4

| Antibody                                         | Reference                            | Dilution   |
|--------------------------------------------------|--------------------------------------|------------|
| Peroxidase AffiniPure Goat Anti-Mouse IgG (H+L)  | Jackson ImmunoResearch - 115-035-003 | 1 : 10 000 |
| Peroxidase AffiniPure Goat Anti-Rabbit IgG (H+L) | Jackson ImmunoResearch - 115-035-144 | 1 : 10 000 |
| Peroxidase AffiniPure Goat Anti-Rat IgG (H+L)    | Jackson ImmunoResearch - 115-035-143 | 1 : 10 000 |
| Anti FLAG-M2                                     | SIGMA-ALDRICH - F3165                | 1 : 20 000 |
| Anti-GFP                                         | Takara - 632 381                     | 1 : 5 000  |
| Anti-Kar2 HDEL                                   | Santa Cruz - sc 53472                | 1 : 5 000  |
| Anti-Pdi1                                        | Invitrogen – MAI-10032               | 1 : 2 000  |
| Anti-Pab1                                        | Abcam - ab 189635                    | 1 : 10 000 |
| Anti-Tub1                                        | Santa Cruz - sc 53030                | 1 : 2 000  |
| Anti-Hac1                                        | Peter Walter <sup>7</sup>            | 1 : 8 000  |
| Anti RNA Polymerase II (8WG16)                   | Eurogentec MMS-126P-050              | 1µl/OD     |
